# Supplementary material for: Sub-50 fs excited state dynamics of 6-chloroguanine upon deep ultraviolet excitation
Source: Royal Society of Chemistry journal article supplement (doi:10.1039/c6cp01746k), 2016-01-01
Supplement: c6cp01746k1.pdf [file c6cp01746k1.pdf]

**Supporting Material**

**Sub-50 fs excited state dynamics of 6-chloroguanine  
upon deep ultraviolet excitation**

Sayan Mondal and Mrinalini Puranik\*

Indian Institute of Science Education and Research,  
Pune – 411008, India

\*Corresponding Author

Address: Indian Institute of Science Education and Research  
Dr. Homi Bhabha Road, Pashan, Pune-411 008, India, Phone: +91-7350694600

Current Address: Hindustan Unilever Limited, Research Centre, 64, Main Road, Whitefield,  
Bangalore 560066

E-mail: [mrinalini@iiserpune.ac.in](mailto:mrinalini@iiserpune.ac.in); [puranik.mrinalini@gmail.com](mailto:puranik.mrinalini@gmail.com)

## FIGURES

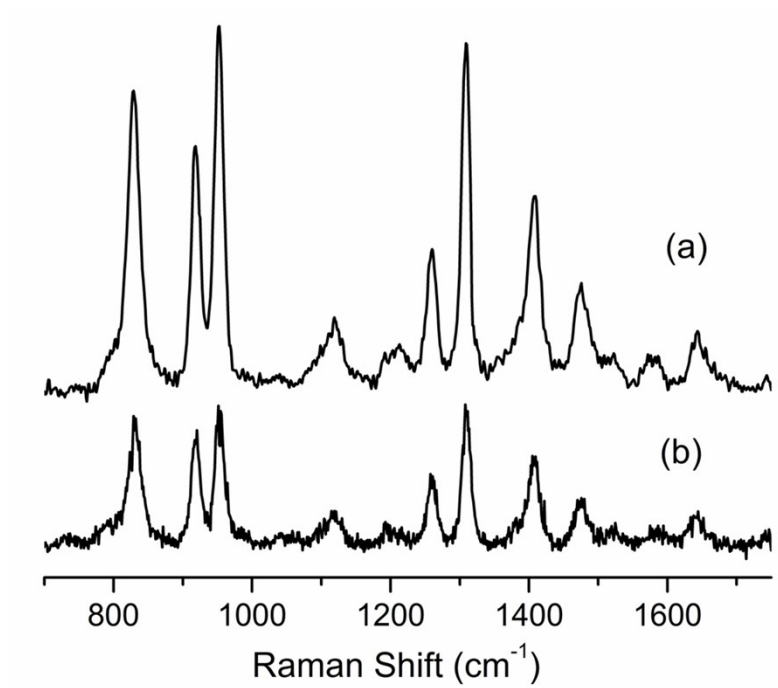

**Fig S1.** (a) parallel polarized and (b) depolarized spectra of 6-CIG with 220 nm laser excitation. Incident laser power on sample was 0.6 mw.

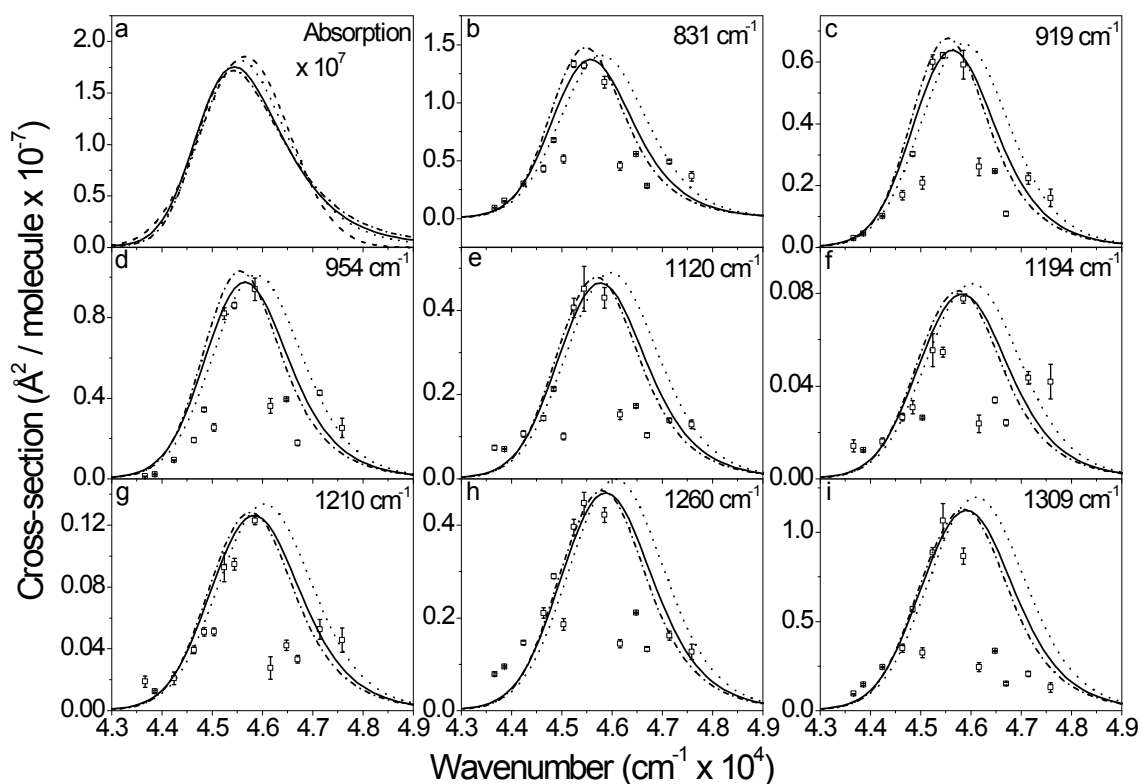

**Fig. S2.** Dependence of the simulated absorption and Raman excitation profiles on inverse of solvent relaxation time,  $\Lambda$ . Panel (a) the experimental (*dashed*) and simulated (*solid*) absorption spectrum. Panel (b-i) The experimental (*open square*) and simulated (*solid*) Raman excitation profiles for eight resonant modes of 6-CIG. The simulated absorption and Raman excitation profiles were obtained by using the best fitted parameters in Table 2 while varying  $\Lambda$  and adjusting  $E_0$ . Set 1 (*dash dot*) and set 2 (*dot*) were obtained with values of  $\Lambda$  of  $550 \text{ cm}^{-1}$  and  $175 \text{ cm}^{-1}$  respectively with adjusted  $E_{00}$  values to  $45820 \text{ cm}^{-1}$  and  $45680 \text{ cm}^{-1}$  respectively while all other parameters remained the same.

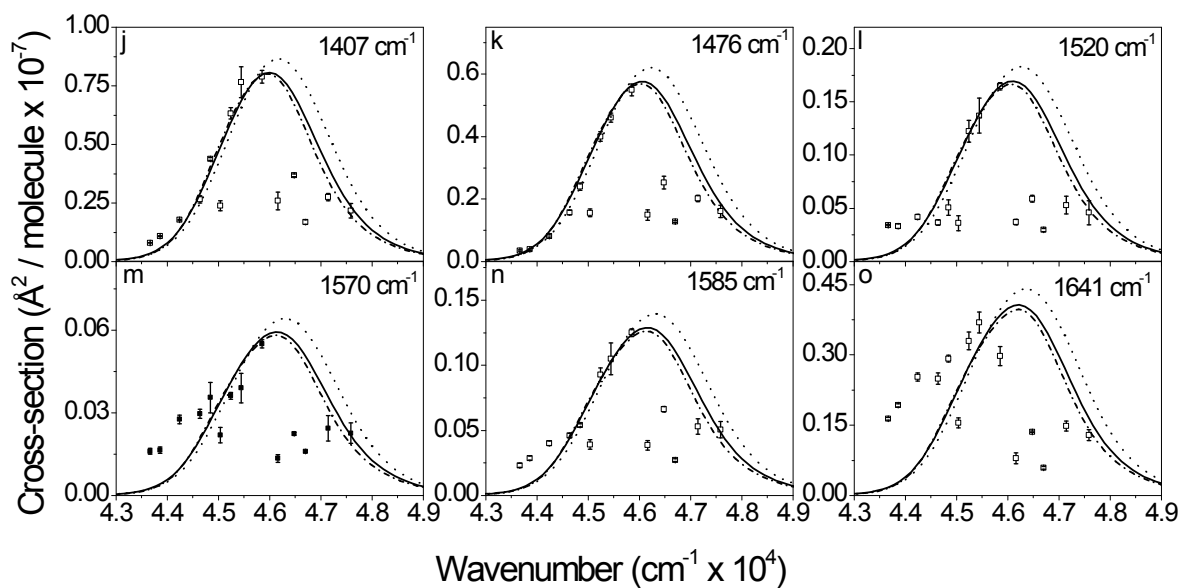

**Fig. S3.** Dependence of the simulated absorption and Raman excitation profiles on the amplitude of homogeneous broadening parameter,  $\Delta$ . Panels (j)-(o): experimental (*open square*) and simulated (*solid*) Raman excitation profiles for five resonant modes of 6-ClG. The absorption and Raman excitation profiles were obtained with the same set of parameters as in Figure S2.

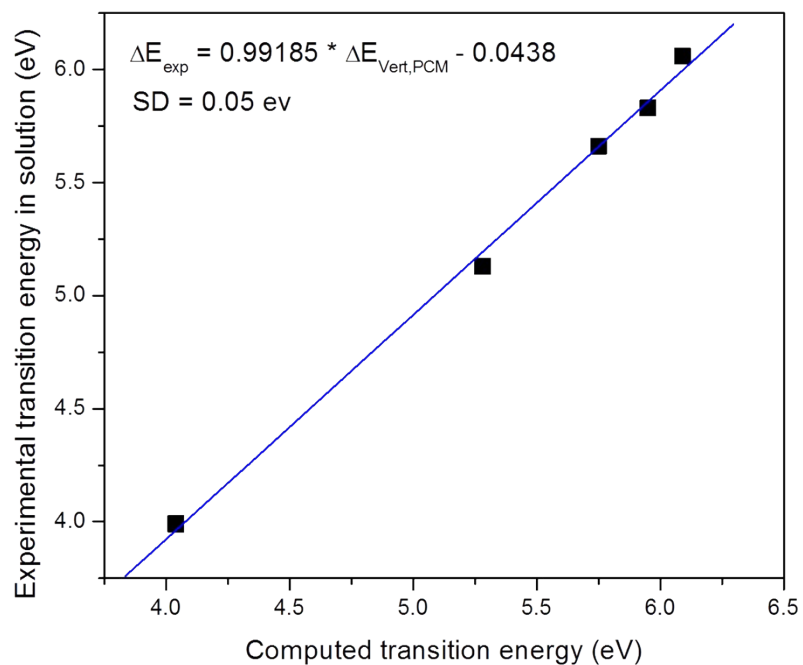

**Fig. S4.** Linear fit to experimental transition energies as a function of computed transition energies of 6-ClG•6H<sub>2</sub>O complex. Computed transition energies were obtained using cluster-continuum model at TD-B3LYP/6-311+G(2d,p)//PCM level of theory and experimental values. Computed and experimental values are taken from Table 1 and converted to eV for plotting.

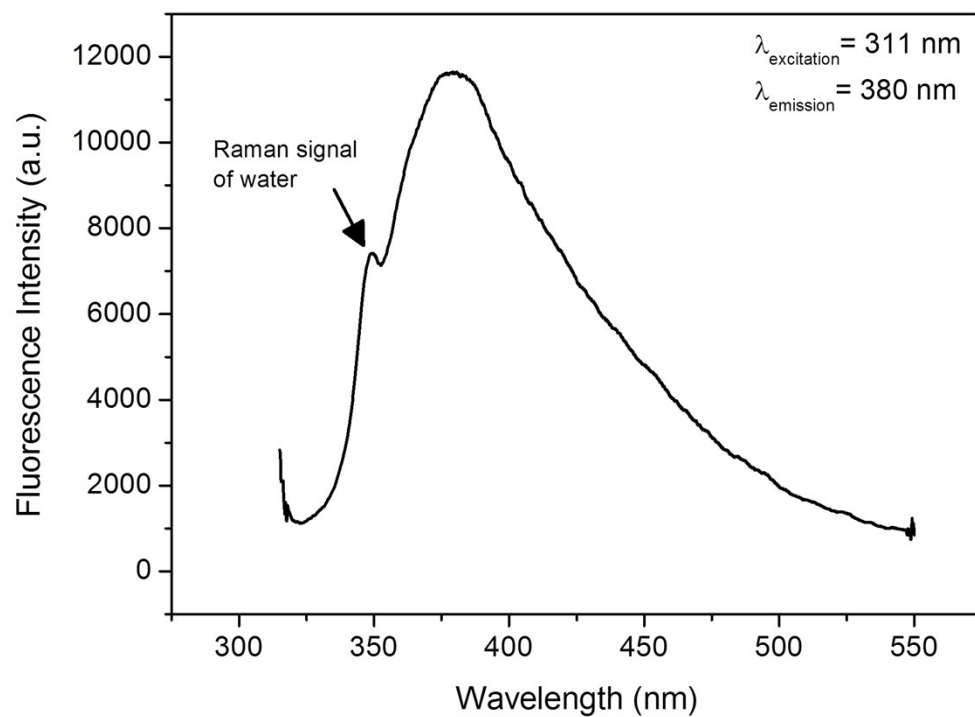

**Fig. S5.** Steady state fluorescence spectra of 6-CIG (2.5 mM in Phosphate buffer, pH 7.0, 20 mM) with 311 nm excitation wavelength. Emission spectra was recorded with Fluorolog spectrophotometer (FluoroMax 4, Horiba Scientific, USA).

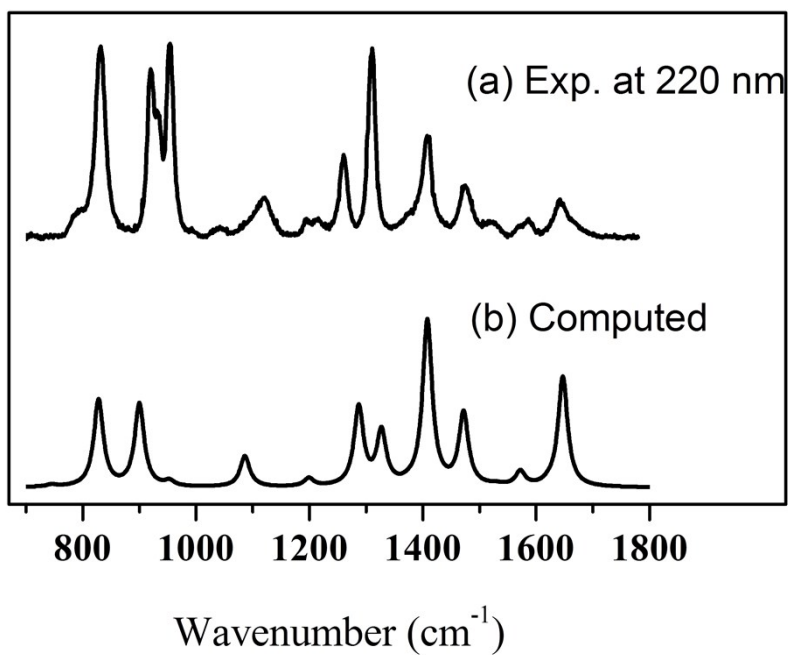

**Fig. S6.** (a) Experimental RR spectrum of 6-CIG at 220 nm and (b) computed spectrum with excited state ( $B_b$ ) gradient computed at TD-B3LYP level of theory. This spectrum is computed using Equation S1 and method described in of ESI<sup>†</sup>.

## TABLES

**Table S1.** Depolarization ratios of Raman bands of solvents at excitation wavelength of 220 nm.  
<sup>a</sup>This Work; <sup>b</sup>Ref 86 of main paper

| Solvent            | RR Band (cm <sup>-1</sup> ) | Depolarization ratio<br>$\lambda_{\text{exc}}=220\text{nm}^{\text{a}}$ | Depolarization ratio<br>$\lambda_{\text{exc}}=220\text{nm}^{\text{b}}$ |
|--------------------|-----------------------------|------------------------------------------------------------------------|------------------------------------------------------------------------|
| NaNO <sub>3</sub>  | 1045                        | 0.21                                                                   | 0.19 ± 0.05                                                            |
| NaClO <sub>4</sub> | 932                         | 0.018                                                                  | 0.04 ± 0.02                                                            |
| Acetonitrile       | 919                         | 0.078                                                                  | 0.08 ± 0.02                                                            |
|                    | 1375                        | 0.5                                                                    | 0.45 ± 0.06                                                            |



**Table S2.** Absorption cross-section of  $B_b$  electronic state of 6-CIG and GMP.

| State | 6-CIG <sup>a</sup>       |           | Guo <sup>b</sup>         |           |
|-------|--------------------------|-----------|--------------------------|-----------|
|       | $\Delta E_{Exp}$<br>(nm) | $f_{exp}$ | $\Delta E_{Exp}$<br>(nm) | $f_{exp}$ |
| $B_b$ | 219.1                    | 0.62      | 200                      | 0.4       |

<sup>a</sup>this study; <sup>b</sup>Ref 110 of main paper, guanosine in aqueous solution at pH 6.0, experimental oscillator strength ( $f_{exp}$ ) is evaluated with the formula,  $f_{exp} = 1.13 \times 10^{12} \eta \int \sigma(\tilde{\nu}) d\tilde{\nu}$ , where  $\eta$  is refractive index of the medium and  $\int \sigma(\tilde{\nu}) d\tilde{\nu}$  is integrated absorption cross-section in  $\text{cm}^2 \text{molecule}^{-1}$ .

**Table S3.** Coordinate of the optimized structure of 6-ClG.6H<sub>2</sub>O complex at B3LYP/6-311+G(2d,p)//PCM level described in Fig 1.

|   |              |              |              |
|---|--------------|--------------|--------------|
| N | 0.029122000  | -1.433469000 | 0.043728000  |
| C | 1.069940000  | -0.545825000 | 0.030316000  |
| N | 0.927304000  | 0.797116000  | 0.025623000  |
| C | -0.334469000 | 1.213200000  | -0.007139000 |
| C | -1.474145000 | 0.388454000  | -0.011473000 |
| C | -1.201009000 | -0.968081000 | 0.025356000  |
| N | -0.812667000 | 2.490979000  | -0.041554000 |
| C | -2.181160000 | 2.395031000  | -0.068395000 |
| N | -2.621797000 | 1.161915000  | -0.049509000 |
| N | 2.313882000  | -1.050126000 | 0.035520000  |
| C | -2.510972000 | -2.128306000 | 0.045568000  |
| H | -2.806183000 | 3.273707000  | -0.102423000 |
| H | -0.250085000 | 3.355067000  | -0.071838000 |
| H | 2.474395000  | -2.051527000 | -0.038853000 |
| H | 3.107436000  | -0.431519000 | -0.115885000 |
| O | 0.370307000  | -4.317125000 | 0.260467000  |
| H | -0.177575000 | -4.757276000 | -0.400361000 |
| H | 0.179663000  | -3.357326000 | 0.167768000  |
| O | 3.045798000  | -3.952457000 | -0.220527000 |
| H | 2.135861000  | -4.277424000 | -0.044387000 |
| H | 3.588984000  | -4.290740000 | 0.500786000  |
| O | 4.707115000  | 0.736803000  | -0.390873000 |
| H | 5.014485000  | 0.846006000  | -1.298506000 |
| H | 4.261420000  | 1.575266000  | -0.159755000 |
| O | 2.911988000  | 2.708995000  | 0.521800000  |
| H | 2.224280000  | 2.001946000  | 0.394418000  |
| H | 3.064839000  | 2.761119000  | 1.474519000  |
| O | -5.433377000 | 0.549393000  | -0.112575000 |
| H | -5.531012000 | -0.375277000 | -0.365798000 |
| H | -4.463750000 | 0.706353000  | -0.090691000 |
| O | 1.019974000  | 4.651816000  | -0.189506000 |
| H | 0.950556000  | 5.380869000  | 0.438723000  |
| H | 1.812918000  | 4.141001000  | 0.078693000  |

**Table S4.** Experimental, computed wavenumbers and potential energy distributions (PED) of all RR bands of 6-CIG.

| Experimental<br>(cm <sup>-1</sup> ) | Computed frequency <sup>a</sup><br>(cm <sup>-1</sup> ) | PED (%) <sup>b</sup>                                                                      |
|-------------------------------------|--------------------------------------------------------|-------------------------------------------------------------------------------------------|
| 800                                 | 807                                                    | tors C6N1C2N3 (14) – N1C2N3C4 (21) + C5N7C8N9 (12) – out N2N1N3C2 (10) + N3N9C5C4 (32)    |
| 831                                 | 828                                                    | str N3C4 (10) – be C2N3C4 (10) + N1C2N3 (17) + C4N9C8 (21)                                |
| 919                                 | 900                                                    | str N1C2 (13 ) + N2C2 (10 ) – Cl6C6 (23 ) + be C6N1C2 (11 ) + C5N7C8 (12 ) – N9C8N7 (12 ) |
| 954                                 | 953                                                    | – be C5N7C8 (12) + N9C8N7 (47)                                                            |
| 1043                                | 1037                                                   | str N1C2 (25) – be H2aN2C2 (11) – Cl6C6N1 (11)                                            |
| 1088                                | 1086                                                   | str N9C8 (54) – be N9N9C4 (28)                                                            |
| 1120                                | 1103                                                   | str N3C2 (25) + be H2aN2C2 (48)                                                           |
| 1194                                | 1199                                                   | str N7C5 (21) – be C5N7C8 (10) + H8C8N7 (24)                                              |
| 1260                                | 1287                                                   | str N7C8 (16) – N1C6 (19) + N3C4 (15) + N1C2 (14) + be H8C8N7 (10)                        |
| 1309                                | 1327                                                   | – str N7C8 (15) + N7C5 (14) – be C5N7C8 (11) – H8C8N7 (23) + N9C8N7 (12)                  |
| 1407                                | 1408                                                   | str N1C6 (23) – N3C4 (12) – N2C2 (12) + N9C4 (17)                                         |
| 1476                                | 1472                                                   | str N2C2 (20) + be N1C2N3 (15)                                                            |
| 1520                                | 1528                                                   | str N7C8 (37) – be H8C8N7 (19)                                                            |
| 1585                                | 1572                                                   | str N3C4 (12) + str N3C2 (19) – be C2N3C4 (11) – C4N9C8 (13)                              |
| 1602                                | 1622                                                   | str N2C2 (10) + be H2aN2H2a (76)                                                          |
| 1641                                | 1647                                                   | str N1C6 (18) + N3C4 (16) – be N3C4C5 (14)                                                |

<sup>a</sup> at B3LYP/6-311+G(2d,p)//PCM; <sup>b</sup>using VEDA 4.0, sign indicates relative phase of movement of internal coordinates.

**Table S5.** Depolarization ratio for Raman bands of 6-ClG obtained at excitation wavelength of 220 nm.

| RR Band<br>( $\text{cm}^{-1}$ )      | Depolarization ratio |
|--------------------------------------|----------------------|
| 6-ClG, $\lambda_{\text{exc}}=220$ nm |                      |
| 831                                  | $0.37 \pm 0.04$      |
| 919                                  | $0.38 \pm 0.02$      |
| 954                                  | $0.35 \pm 0.05$      |
| 1120                                 | $0.40 \pm 0.04$      |
| 1260                                 | $0.38 \pm 0.01$      |
| 1309                                 | $0.33 \pm 0.04$      |
| 1407                                 | $0.37 \pm 0.04$      |
| 1476                                 | $0.35 \pm 0.04$      |
| 1643                                 | $0.46 \pm 0.16$      |

**Table S6.** Sign of dimensionless displacements ( $\Delta$ ) on resonant  $B_b$  electronic state obtained with three different functionals at B3LYP optimized geometry on isolated 6-CIG.

| Experimental wavenumber<br>( $\text{cm}^{-1}$ ) | Computed wavenumber <sup>a</sup><br>( $\text{cm}^{-1}$ ) | TD-B3LYP<br>on S6 | TD-PBE0<br>on S7 | TD-wB97xD<br>on S6 |
|-------------------------------------------------|----------------------------------------------------------|-------------------|------------------|--------------------|
| 800                                             | 807                                                      | -1                | -1               | -1                 |
| 831                                             | 828                                                      | -1                | -1               | -1                 |
| 919                                             | 900                                                      | 1                 | 1                | 1                  |
| 954                                             | 953                                                      | -1                | -1               | -1                 |
| 1043                                            | 1037                                                     | -1                | -1               | -1                 |
| 1088                                            | 1086                                                     | -1                | -1               | -1                 |
| 1120                                            | 1103                                                     | -1                | -1               | -1                 |
| 1194                                            | 1199                                                     | -1                | -1               | -1                 |
| 1260                                            | 1287                                                     | -1                | -1               | -1                 |
| 1309                                            | 1327                                                     | -1                | -1               | -1                 |
| 1407                                            | 1408                                                     | -1                | -1               | -1                 |
| 1476                                            | 1472                                                     | 1                 | 1                | 1                  |
| 1520                                            | 1528                                                     | 1                 | 1                | 1                  |
| 1585                                            | 1572                                                     | -1                | -1               | -1                 |
| 1602                                            | 1622                                                     | -1                | -1               | -1                 |
| 1641                                            | 1647                                                     | 1                 | 1                | 1                  |

<sup>a</sup>at B3LYP/6-311+G(2d,p)//PCM; All calculations are performed with 6-311+G(2d,p) basis set and PCM solvation. All single point TD-DFT calculations are performed on equilibrium geometry of isolated 6-CIG, optimized with B3LYP functional. Signs of  $\Delta$ s (with three functional mentioned) are obtained with ground state normal modes computed with B3LYP functional using Equation S2 and S3.  $B_b$  state of 6-CIG corresponds to the computed 6<sup>th</sup> (S6), 7<sup>th</sup> (S7) and 6<sup>th</sup> (S6) singlet state with B3LYP, PBE0 and wB97xD functional respectively.

### Method of determining sign of dimensionless $\Delta$ s

Within independent mode displaced harmonic oscillator model (IMDHO) and assumption of short-time dynamics,<sup>1-5</sup> the resonance Raman (RR) intensity,  $I_k$  of  $k^{\text{th}}$  fundamental mode can be expressed as,<sup>5-10</sup>

$$I_k \propto \frac{1}{\omega_k^g \mu_k^g} \left( \frac{\partial E^N}{\partial Q_k} \right)_{FC}^2 \quad (S1)$$

where  $\omega_k$  and  $\mu_k$  are the frequency and reduced mass of  $k^{\text{th}}$  mode and  $V_k = (\partial E^N / \partial Q_k)_{FC}$  is the mass-weighted gradient in Frank-Condon (FC) region of the  $N^{\text{th}}$  resonant electronic surface along  $k^{\text{th}}$  normal mode coordinate. The superscript ‘N’ and ‘g’ stand for  $N^{\text{th}}$  electronic excited state and ground electronic state respectively.

In this formalism, the dimensionless displacement,  $\Delta_k$  is expressed as,

$$\Delta_k \propto - \frac{1}{\omega_k^g} \left( \frac{\partial E^N}{\partial Q_k} \right)_{FC} = - \frac{1}{\omega_k} V_k \quad (S2)$$

The gradient,  $V_k$  is evaluated as,<sup>9</sup>

$$V_k = \left( \frac{\partial E^N}{\partial Q_k} \right)_{FC} = L^T \left( \frac{\partial E^N}{\partial \mathbf{x}} \right)_{FC} \quad (S3)$$

where the  $L$  is the orthogonal matrix obtained as solution of ground state normal mode eigenvalue problem.  $L$  is a matrix of  $3N \times (3N-6)$  dimension. Transpose of this matrix,  $L^T$  performs the basis change from cartesian coordinate to normal mode coordinate.  $(\partial E^N / \partial \mathbf{x})_{FC}$  is non-mass weighted cartesian forces (in Hartrees/Bohr) obtained from analytic gradient calculation<sup>11</sup> within TD-DFT formalism. For a molecule having  $N$  atoms both  $(\partial E^N / \partial Q_k)_{FC}$  and  $(\partial E^N / \partial \mathbf{x})_{FC}$  are column vector of  $(3N-6) \times 1$  and  $3N \times 1$  dimensions respectively.

## References

- 1 E. J. Heller, *Acc. Chem. Res.*, 1981, **14**, 368–375.
- 2 E. J. Heller, R. Sundberg and D. Tannor, *J. Phys. Chem.*, 1982, **86**, 1822–1833.
- 3 L. Jensen, J. Autschbach and G. C. Schatz, *J. Chem. Phys.*, 2005, **122**, 224115.
- 4 L. Jensen, L. L. Zhao, J. Autschbach and G. C. Schatz, *J. Chem. Phys.*, 2005, **123**, 174110.
- 5 T. Petrenko and F. Neese, *J. Chem. Phys.*, 2012, **137**, 234107.
- 6 P. G. Szalay and G. Fogarasi, *Chem. Phys. Lett.*, 1997, **270**, 406–412.
- 7 A. A. Jarzęcki and T. G. Spiro, *J. Phys. Chem. A*, 2005, **109**, 421–430.
- 8 T. Petrenko, K. Ray, K. E. Wieghardt and F. Neese, *J. Am. Chem. Soc.*, 2006, **128**, 4422–4436.
- 9 J. Guthmuller, *J. Chem. Theory Comput.*, 2011, **7**, 1082–1089.
- 10 A. A. Jarzęcki, *J. Phys. Chem. A*, 2009, **113**, 2926–2934.
- 11 G. Scalmani, M. J. Frisch, B. Mennucci, J. Tomasi, R. Cammi and V. Barone, *J. Chem. Phys.*, 2006, **124**, 094107.
